# Supplementary material
Source: PubMed Central journal article supplement (PMC3703989)
Supplement: 1301023110_pnas.201301023SI.pdf [file 1301023110_pnas.201301023SI.pdf]

# Supporting Information

Fasani and Savageau 10.1073/pnas.1301023110

## SI Text

**Model Background.** Some of the earliest identified toxin–antitoxin systems were *ccdAB* (1), *kis-kid* (2), *pemIK* (identical to *kis-kid*) (3), and *phd-doc* (4), found on plasmids F, R1, R100, and P1, respectively. In those systems, the toxin–antitoxin locus appears to act as a so-called addiction module, ensuring the stable maintenance of the plasmid. Following plasmid loss, the toxin outlasts the labile antitoxin and kills the cell, albeit in a variety of manners: *ccdAB* blocks DNA replication via DNA gyrase (5, 6), whereas *kis-kid* and *phd-doc* target different aspects of the translational machinery (7, 8). Eventually, toxin–antitoxin systems were identified in chromosomes as well. The *mazEF* locus, originally dubbed *chpA*, or chromosomal homologous to *pem* (9), was followed by others, including *relBE* (10) and *yefM-yoeB* (11). In fact, the distinction between plasmid-borne and chromosomal toxin–antitoxin systems is blurry: *ccdAB*, originally found on plasmid F, can also be found on the chromosome of *Escherichia coli* O157 (12). On the basis of the form of the antitoxin and its method of toxin neutralization, toxin–antitoxin systems are classified as type I, II, or III. Type II systems, which we model in this work, account for more than half the toxin–antitoxin systems in *E. coli* and are characterized by an antitoxic protein, as opposed to RNA, that binds directly to the toxic protein (13). Like their plasmid-borne counterparts, chromosomal toxin–antitoxin systems were first described as suicide modules, the executors of programmed cell death (14). However, it was later shown that poisoned cells could

recover, suggesting that chromosomal toxin–antitoxin systems instead induce reversible bacteriostasis (15), reminiscent of a persistent cell.

**Known Molecular Mechanisms.** Toxin and antitoxin syntheses are translationally coupled and the relative positioning of genes ensures more antitoxin is produced (4, 16, 17). The antitoxin neutralizes the toxin by forming a tight complex (14, 18–22) and can bind more than one toxin (23–27). In fact, the ability to bind a second toxin has probably led to at least one debate regarding toxin–antitoxin stoichiometries in solution (23, 27, 28). The antitoxin is also an autorepressor that binds two or more operators. In most well-studied toxin–antitoxin systems, the operators are dissimilar, with one dominant, high-affinity site (25, 28–32). Furthermore, the antitoxin increases in both affinity and cooperativity when in complex with a toxin (25, 28, 30, 32–34), in at least some cases via a bridging mechanism (31, 35–37). However, when the antitoxin binds a second toxin, its affinity and cooperativity are reduced—this conditional cooperativity controls the ratio of toxin to antitoxin, in addition to the overall concentrations. Increased proteolytic activity removes the relatively labile antitoxin (14, 38–42), allowing the free toxin to inhibit cellular translation in various ways (43). Details vary: the number of operator sites, the target of translational inhibition, and whether the stable toxin is monomeric or dimeric. Nevertheless, the picture remains remarkably consistent across a broad spectrum of systems.

- Ogura T, Hiraga S (1983) Mini-F plasmid genes that couple host cell division to plasmid proliferation. *Proc Natl Acad Sci USA* 80(15):4784–4788.
- Bravo A, de Torrontegui G, Diaz R (1987) Identification of components of a new stability system of plasmid R1, ParD, that is close to the origin of replication of this plasmid. *Mol Gen Genet* 210(1):101–110.
- Tsuchimoto S, Ohtsubo H, Ohtsubo E (1988) Two genes, *pemK* and *pemI*, responsible for stable maintenance of resistance plasmid R100. *J Bacteriol* 170(4):1461–1466.
- Lehnherr H, Maguin E, Jafri S, Yarmolinsky MB (1993) Plasmid addiction genes of bacteriophage P1: *doc*, which causes cell death on curing of prophage, and *phd*, which prevents host death when prophage is retained. *J Mol Biol* 233(3):414–428.
- Bahassi EM, et al. (1999) Interactions of CcdB with DNA gyrase. Inactivation of Gyra, poisoning of the gyrase-DNA complex, and the antidote action of CcdA. *J Biol Chem* 274(16):10936–10944.
- Kampranis SC, Howells AJ, Maxwell A (1999) The interaction of DNA gyrase with the bacterial toxin CcdB: Evidence for the existence of two gyrase-CcdB complexes. *J Mol Biol* 293(3):733–744.
- Zhang J, Zhang Y, Zhu L, Suzuki M, Inouye M (2004) Interference of mRNA function by sequence-specific endoribonuclease PemK. *J Biol Chem* 279(20):20678–20684.
- Liu M, Zhang Y, Inouye M, Woychik NA (2008) Bacterial addiction module toxin Doc inhibits translation elongation through its association with the 30S ribosomal subunit. *Proc Natl Acad Sci USA* 105(15):5885–5890.
- Masuda Y, Miyakawa K, Nishimura Y, Ohtsubo E (1993) *chpA* and *chpB*, *Escherichia coli* chromosomal homologs of the *pem* locus responsible for stable maintenance of plasmid R100. *J Bacteriol* 175(21):6850–6856.
- Gottfredsen M, Gerdes K (1998) The *Escherichia coli relBE* genes belong to a new toxin-antitoxin gene family. *Mol Microbiol* 29(4):1065–1076.
- Grady R, Hayes F (2003) Axe-Txe, a broad-spectrum proteic toxin-antitoxin system specified by a multidrug-resistant, clinical isolate of *Enterococcus faecium*. *Mol Microbiol* 47(5):1419–1432.
- Wilbaux M, Mine N, Guéroult A-M, Mazel D, Van Melderen L (2007) Functional interactions between coexisting toxin-antitoxin systems of the *ccd* family in *Escherichia coli* O157:H7. *J Bacteriol* 189(7):2712–2719.
- Yamaguchi Y, Inouye M (2011) Regulation of growth and death in *Escherichia coli* by toxin-antitoxin systems. *Nat Rev Microbiol* 9(11):779–790.
- Aizenman E, Engelberg-Kulka H, Glaser G (1996) An *Escherichia coli* chromosomal “addiction module” regulated by guanosine [corrected] 3',5'-bispyrophosphate: A model for programmed bacterial cell death. *Proc Natl Acad Sci USA* 93(12):6059–6063.
- Pedersen K, Christensen SK, Gerdes K (2002) Rapid induction and reversal of a bacteriostatic condition by controlled expression of toxins and antitoxins. *Mol Microbiol* 45(2):501–510.
- Ruiz-Echevarria MJ, de la Cueva G, Diaz-Orejas R (1995) Translational coupling and limited degradation of a polycistronic messenger modulate differential gene expression in the *parD* stability system of plasmid R1. *Mol Gen Genet* 248(5):599–609.
- Overgaard M, Borch J, Gerdes K (2009) RelB and RelE of *Escherichia coli* form a tight complex that represses transcription via the ribbon-helix-helix motif in RelB. *J Mol Biol* 394(2):183–196.
- Ruiz-Echevarria MJ, Giménez-Gallego G, Sabariego-Jareño R, Diaz-Orejas R (1995) Kid, a small protein of the *parD* stability system of plasmid R1, is an inhibitor of DNA replication acting at the initiation of DNA synthesis. *J Mol Biol* 247(4):568–577.
- Maki S, Takiguchi S, Horiuchi T, Sekimizu K, Miki T (1996) Partner switching mechanisms in inactivation and rejuvenation of *Escherichia coli* DNA gyrase by F plasmid proteins LetD (CcdB) and LetA (CcdA). *J Mol Biol* 256(3):473–482.
- Gazit E, Sauer RT (1999) The Doc toxin and Phd antidote proteins of the bacteriophage P1 plasmid addiction system form a heterotrimeric complex. *J Biol Chem* 274(24):16813–16818.
- Galvani C, Terry J, Ishiguro EE (2001) Purification of the RelB and RelE proteins of *Escherichia coli*: RelE binds to RelB and to ribosomes. *J Bacteriol* 183(8):2700–2703.
- Kamada K, Hanaoka F (2005) Conformational change in the catalytic site of the ribonuclease YoeB toxin by YefM antitoxin. *Mol Cell* 19(4):497–509.
- Dao-Thi M-H, et al. (2002) Intricate interactions within the *ccd* plasmid addiction system. *J Biol Chem* 277(5):3733–3742.
- Kamada K, Hanaoka F, Burley SK (2003) Crystal structure of the MazE/MazF complex: Molecular bases of antidote-toxin recognition. *Mol Cell* 11(4):875–884.
- Monti MC, et al. (2007) Interactions of Kid-Kis toxin-antitoxin complexes with the *parD* operator-promoter region of plasmid R1 are piloted by the Kis antitoxin and tuned by the stoichiometry of Kid-Kis oligomers. *Nucleic Acids Res* 35(5):1737–1749.
- Li G-Y, Zhang Y, Inouye M, Ikura M (2008) Structural mechanism of transcriptional autorepression of the *Escherichia coli* RelB/RelE antitoxin/toxin module. *J Mol Biol* 380(1):107–119.
- Arbing MA, et al. (2010) Crystal structures of Phd-Doc, HigA, and YeeU establish multiple evolutionary links between microbial growth-regulating toxin-antitoxin systems. *Structure* 18(8):996–1010.
- Overgaard M, Borch J, Jørgensen MG, Gerdes K (2008) Messenger RNA interferase RelE controls *relBE* transcription by conditional cooperativity. *Mol Microbiol* 69(4):841–857.
- Gazit E, Sauer RT (1999) Stability and DNA binding of the phd protein of the phage P1 plasmid addiction system. *J Biol Chem* 274(5):2652–2657.
- Marianovsky I, Aizenman E, Engelberg-Kulka H, Glaser G (2001) The regulation of the *Escherichia coli mazEF* promoter involves an unusual alternating palindrome. *J Biol Chem* 276(8):5975–5984.
- Madl T, et al. (2006) Structural basis for nucleic acid and toxin recognition of the bacterial antitoxin CcdA. *J Mol Biol* 364(2):170–185.
- Kędzierska B, Lian L-Y, Hayes F (2007) Toxin-antitoxin regulation: Bimodal interaction of YefM-YoeB with paired DNA palindromes exerts transcriptional autorepression. *Nucleic Acids Res* 35(1):325–339.
- Magnuson R, Yarmolinsky MB (1998) Corepression of the P1 addiction operon by Phd and Doc. *J Bacteriol* 180(23):6342–6351.

34. Afif H, Allali N, Couturier M, Van Melderen L (2001) The ratio between CcdA and CcdB modulates the transcriptional repression of the *ccd* poison-antidote system. *Mol Microbiol* 41(1):73–82.
35. Buts L, Lah J, Dao-Thi M-H, Wyns L, Loris R (2005) Toxin-antitoxin modules as bacterial metabolic stress managers. *Trends Biochem Sci* 30(12):672–679.
36. De Jonge N, et al. (2009) Rejuvenation of CcdB-poisoned gyrase by an intrinsically disordered protein domain. *Mol Cell* 35(2):154–163.
37. Garcia-Pino A, et al. (2010) Allosteric and intrinsic disorder mediate transcription regulation by conditional cooperativity. *Cell* 142(1):101–111.
38. Tsuchimoto S, Nishimura Y, Ohtsubo E (1992) The stable maintenance system *pem* of plasmid R100: Degradation of PemI protein may allow PemK protein to inhibit cell growth. *J Bacteriol* 174(13):4205–4211.
39. Van Melderen L, Bernard P, Couturier M (1994) Lon-dependent proteolysis of CcdA is the key control for activation of CcdB in plasmid-free segregant bacteria. *Mol Microbiol* 11(6):1151–1157.
40. Lehnerr H, Yarmolinsky MB (1995) Addiction protein Phd of plasmid prophage P1 is a substrate of the ClpXP serine protease of *Escherichia coli*. *Proc Natl Acad Sci USA* 92(8):3274–3277.
41. Christensen SK, Mikkelsen M, Pedersen K, Gerdes K (2001) RelE, a global inhibitor of translation, is activated during nutritional stress. *Proc Natl Acad Sci USA* 98(25):14328–14333.
42. Christensen SK, et al. (2004) Overproduction of the Lon protease triggers inhibition of translation in *Escherichia coli*: Involvement of the *yefM-yoeB* toxin-antitoxin system. *Mol Microbiol* 51(6):1705–1717.
43. Hayes F, Van Melderen L (2011) Toxins-antitoxins: Diversity, evolution and function. *Crit Rev Biochem Mol Biol* 46(5):386–408.

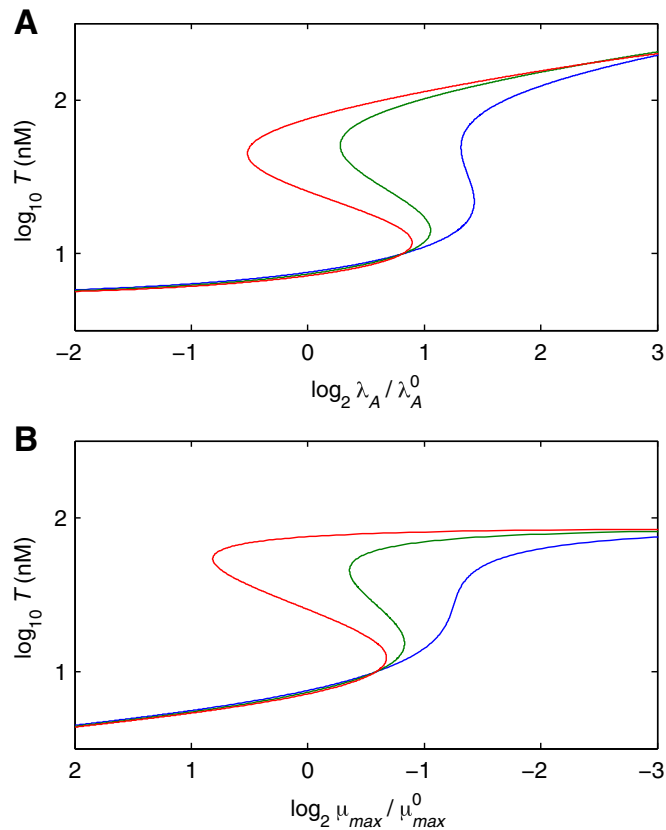

**Fig. S1.** Varying the cooperativity of toxic inhibition. Steady-state toxin concentrations for  $n = 2$  (blue), 2.5 (green), and 3 (red) are shown. (A) Varying  $\lambda_A$  while holding  $\mu_{max} / \mu_{max}^0 = 1$ . (B) Varying  $\mu_{max}$  while holding  $\lambda_A / \lambda_A^0 = 1$ . As  $n$  increases, the width of the bistable buffer increases.

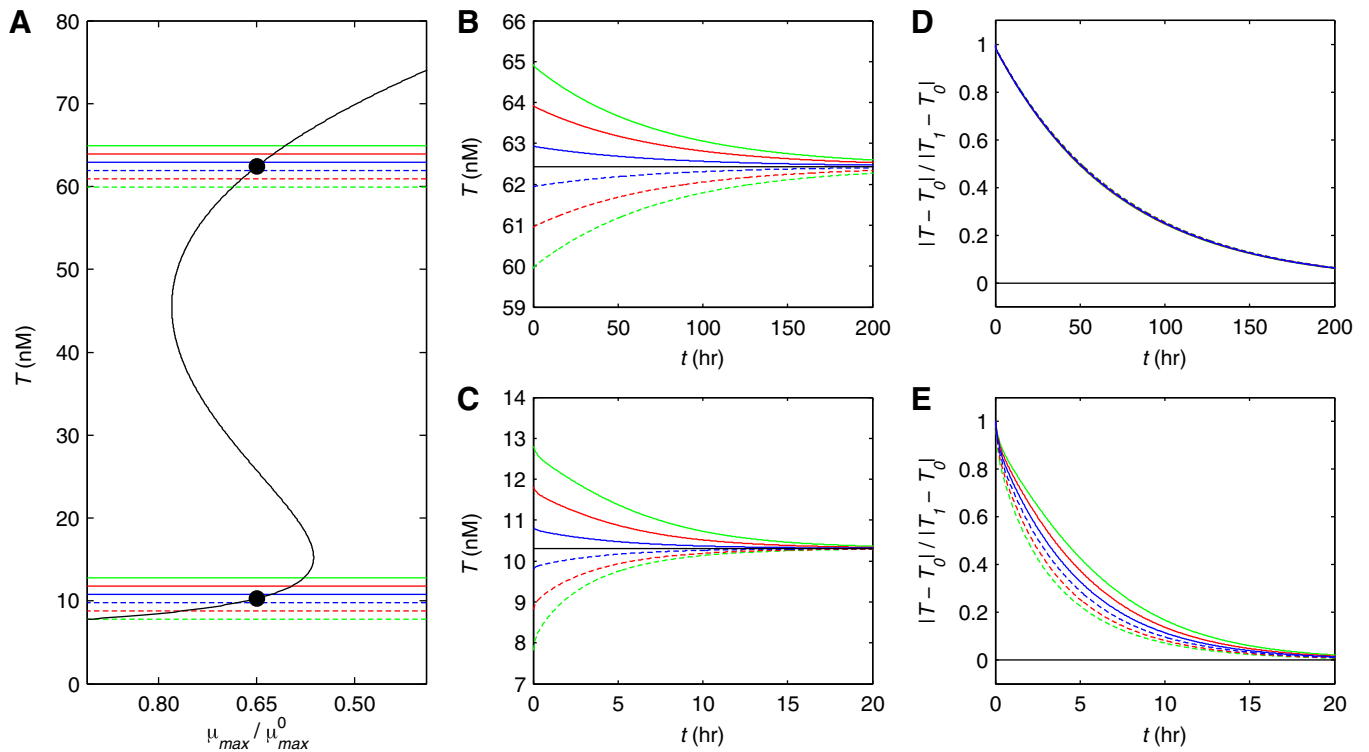

**Fig. S2.** Dynamic response to small perturbations in toxin concentration. (A) For  $n = 2.5$  and  $\mu_{max} / \mu_{max}^0 = 0.65$ , without noise, the steady-state toxin concentration (black circle) is perturbed by +0.5 nM (solid blue line), +1.5 nM (solid red line), +2.5 nM (solid green line), -0.5 nM (dashed blue line), -1.5 nM (dashed red line), or -2.5 nM (dashed green line) and then allowed to return to steady state. (B and C) Dynamic responses to the instantaneous change starting from either the high (B) or the low (C) toxin concentrations. (D and E) The dynamic responses shown in B and C, respectively, normalized to initial ( $T_1$ ) and final ( $T_0$ ) steady-state values.

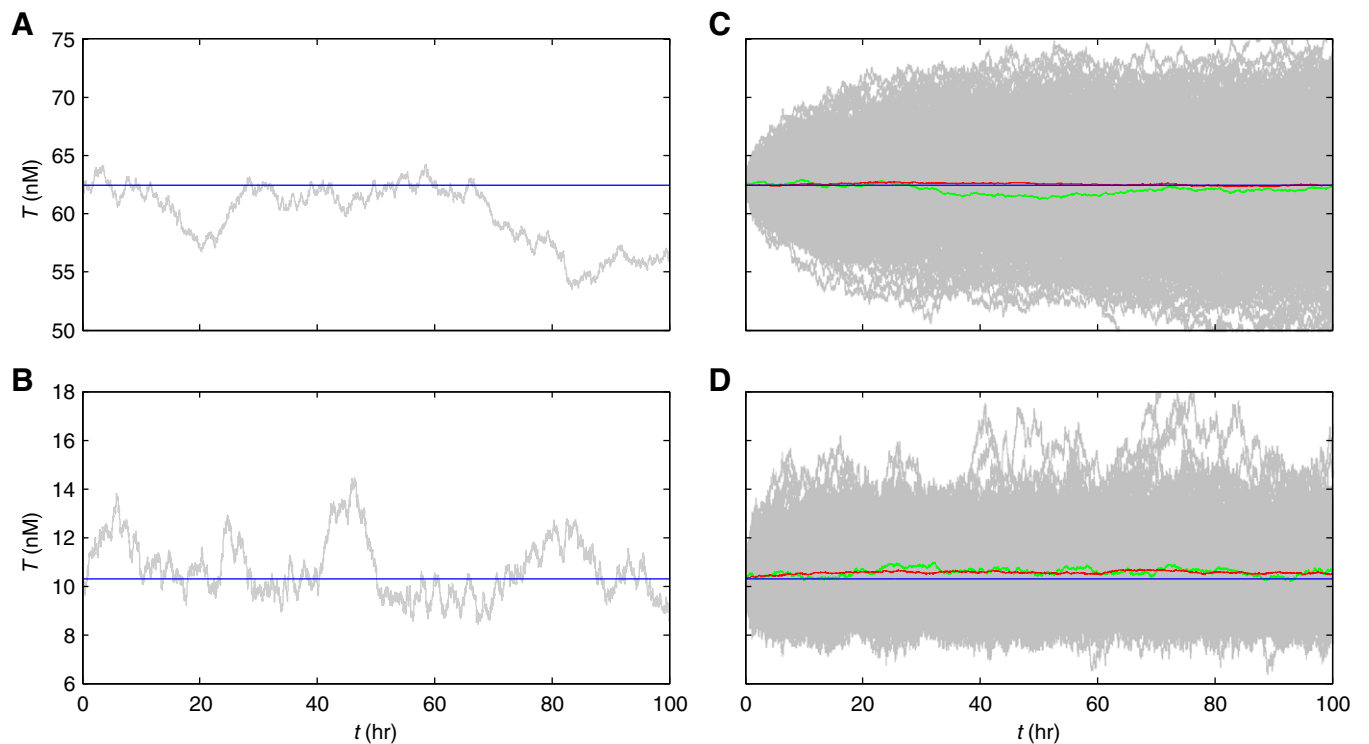

**Fig. S3.** Stochastic simulation of a single system with small perturbations. (A and B) For  $n = 2.5$  and  $\mu_{max} / \mu_{max}^0 = 0.65$ , the system was poised at either the high (A) or the low (B) steady-state toxin concentration and then simulated with stochastic noise ( $d = 0.1$ ) (gray) or without noise (blue). (C and D) Starting from the same high (C) or low (D) toxin concentrations, the tests were repeated 500 times (gray). The mean of 50 of the stochastic simulations (green) and the mean of all 500 stochastic simulations (red) are compared with the deterministic simulation without noise (blue).

**Table S1. Parameter measurements and estimates**

| Parameter          | <i>kis-kid</i>           | <i>ccdAB</i>              | <i>mazEF</i>             | <i>phd-doc</i>             | <i>relBE</i>                | <i>yefM-yoeB</i>          | Used |
|--------------------|--------------------------|---------------------------|--------------------------|----------------------------|-----------------------------|---------------------------|------|
| $\rho$             | 2 (1, 2)                 | 3 (3)                     | 3 (4)                    | 2 (5)                      | 2 (6)                       | 2 (7)                     | 2    |
| $n$                |                          |                           |                          |                            |                             |                           | 2    |
| $\sigma$           | 2 (8)                    |                           |                          | 14 (9)                     | 10 (10)                     |                           | 10   |
| $\alpha$ , nM/min  |                          |                           |                          |                            |                             |                           | 1    |
| $t_{\mu}$ , min    |                          |                           |                          |                            |                             |                           | 30   |
| $t_A$ , min        |                          | 30 (11, 12)               | 30 (13)                  | 120 (14)                   | >60 (10)                    | 60 (15)                   | 60   |
| $t_T$ , h          |                          | >2 (11)                   | >4 (13)                  |                            |                             |                           | 48   |
| $K_{H1}$ , nM      |                          | 10–10,000 (16)            | <100 (18)*               | 350 (19)                   | 0.33 (10)                   | 400 (15)*                 | 100  |
|                    |                          | 0.020 (17)*               |                          | 240 (19)* <sup>†</sup>     | 154 (20)*                   |                           |      |
| $K_{P1}$ , $\mu$ M | 2.4–4.8 (2) <sup>‡</sup> | 2.8–3.6 (21) <sup>‡</sup> | 1–4 (22) <sup>‡</sup>    | 0.2 (24)                   | 4.1–16.6 (6) <sup>‡</sup>   | >0.25 (7) <sup>‡</sup>    | 1    |
|                    |                          | 1.6–2.4 (16) <sup>‡</sup> | 2.5–2.8 (23)             | 0.24 (25)                  | 12.5 (26)                   |                           |      |
|                    |                          | 2.5 (3)                   |                          | 0.25–0.5 (19) <sup>‡</sup> |                             |                           |      |
| $K_{P2}$ , nM      |                          | <400 (21) <sup>‡,§</sup>  | <100 (22) <sup>‡,§</sup> | 20 (24)                    | 3.4 (6)                     | <12 (7) <sup>‡</sup>      | 10   |
|                    |                          | <440 (16) <sup>‡,§</sup>  |                          | <50 (19) <sup>‡,§</sup>    | 12.5–75 (6) <sup>‡</sup>    | 200–800 (27) <sup>‡</sup> |      |
|                    |                          |                           |                          | 300 (19) <sup>‡</sup>      | 23.4 (26)                   |                           |      |
| $K_{T1}$ , nM      | <500 (28) <sup>‡,¶</sup> |                           |                          |                            | <0.0011 (29) <sup>‡,¶</sup> |                           | 10   |
| $K_{T2}$ , nM      |                          |                           |                          |                            |                             |                           | 100  |

Values are listed by toxin–antitoxin system, including experimental values culled from published literature and estimates based on published figures. Values used in our model are listed in the last column. For simplicity, we list the normal cellular doubling time,  $t_{\mu}$ , and the normal half-lives of the toxin and antitoxin,  $t_T$  and  $t_A$ , rather than the corresponding rate constants  $\mu_{max}^0$ ,  $\lambda_T^0$ , and  $\lambda_A^0$ , which are trivially related by  $\mu_{max}^0 = \ln 2 / t_{\mu}$ ,  $\lambda_T^0 = \ln 2 / t_T$ , and  $\lambda_A^0 = \ln 2 / t_A$ .

\*Experiments used a monomeric antitoxin fragment.

<sup>†</sup>Values appear in the cited article's supplemental information.

<sup>‡</sup>Ranges are estimates based on published EMSAs.

<sup>§</sup>Estimates assume all antitoxin is in complex with toxin.

<sup>¶</sup>Experiments measured translation of single proteins in vitro.

1. Tsuchimoto S, Ohtsubo E (1993) Autoregulation by cooperative binding of the PemI and PemK proteins to the promoter region of the *pem* operon. *Mol Gen Genet* 237(1–2):81–88.
2. Monti MC, et al. (2007) Interactions of Kid-Kis toxin-antitoxin complexes with the *parD* operator-promoter region of plasmid R1 are piloted by the Kis antitoxin and tuned by the stoichiometry of Kid-Kis oligomers. *Nucleic Acids Res* 35(5):1737–1749.
3. Madl T, et al. (2006) Structural basis for nucleic acid and toxin recognition of the bacterial antitoxin CcdA. *J Mol Biol* 364(2):170–185.
4. Marianovsky I, Aizenman E, Engelberg-Kulka H, Glaser G (2001) The regulation of the *Escherichia coli mazEF* promoter involves an unusual alternating palindrome. *J Biol Chem* 276(8):5975–5984.
5. Magnuson R, Lehnerr H, Mukhopadhyay G, Yarmolinsky MB (1996) Autoregulation of the plasmid addition operon of bacteriophage P1. *J Biol Chem* 271(31):18705–18710.
6. Overgaard M, Borch J, Jørgensen MG, Gerdes K (2008) Messenger RNA interferase RelE controls *relBE* transcription by conditional cooperativity. *Mol Microbiol* 69(4):841–857.
7. Kędzierska B, Lian L-Y, Hayes F (2007) Toxin-antitoxin regulation: Bimodal interaction of YefM-YoeB with paired DNA palindromes exerts transcriptional autorepression. *Nucleic Acids Res* 35(1):325–339.
8. Ruiz-Echevarria MJ, de la Cueva G, Diaz-Orejas R (1995) Translational coupling and limited degradation of a polycistronic messenger modulate differential gene expression in the *parD* stability system of plasmid R1. *Mol Gen Genet* 248(5):599–609.
9. Lehnerr H, Maguin E, Jafri S, Yarmolinsky MB (1993) Plasmid addition genes of bacteriophage P1: *doc*, which causes cell death on curing of prophage, and *phd*, which prevents host death when prophage is retained. *J Mol Biol* 233(3):414–428.
10. Overgaard M, Borch J, Gerdes K (2009) RelB and RelE of *Escherichia coli* form a tight complex that represses transcription via the ribbon-helix-helix motif in RelB. *J Mol Biol* 394(2):183–196.
11. Van Melderen L, Bernard P, Couturier M (1994) Lon-dependent proteolysis of CcdA is the key control for activation of CcdB in plasmid-free segregant bacteria. *Mol Microbiol* 11(6):1151–1157.
12. Wilbaux M, Mine N, Guérout A-M, Mazel D, Van Melderen L (2007) Functional interactions between coexisting toxin-antitoxin systems of the *ccd* family in *Escherichia coli* O157:H7. *J Bacteriol* 189(7):2712–2719.
13. Aizenman E, Engelberg-Kulka H, Glaser G (1996) An *Escherichia coli* chromosomal "addiction module" regulated by guanosine [corrected] 3',5'-bispyrophosphate: A model for programmed bacterial cell death. *Proc Natl Acad Sci USA* 93(12):6059–6063.
14. Lehnerr H, Yarmolinsky MB (1995) Addiction protein Phd of plasmid prophage P1 is a substrate of the ClpXP serine protease of *Escherichia coli*. *Proc Natl Acad Sci USA* 92(8):3274–3277.
15. Cherny I, Gazit E (2004) The YefM antitoxin defines a family of natively unfolded proteins: Implications as a novel antibacterial target. *J Biol Chem* 279(9):8252–8261.
16. Dao-Thi M-H, et al. (2002) Intricate interactions within the *ccd* plasmid addiction system. *J Biol Chem* 277(5):3733–3742.
17. De Jonge N, et al. (2009) Rejuvenation of CcdB-poisoned gyrase by an intrinsically disordered protein domain. *Mol Cell* 35(2):154–163.
18. Li G-Y, et al. (2006) Characterization of dual substrate binding sites in the homodimeric structure of *Escherichia coli* mRNA interferase MazF. *J Mol Biol* 357(1):139–150.
19. Garcia-Pino A, et al. (2010) Allostery and intrinsic disorder mediate transcription regulation by conditional cooperativity. *Cell* 142(1):101–111.
20. Li G-Y, Zhang Y, Inouye M, Ikura M (2009) Inhibitory mechanism of *Escherichia coli* RelE-RelB toxin-antitoxin module involves a helix displacement near an mRNA interferase active site. *J Biol Chem* 284(21):14628–14636.
21. Afif H, Allali N, Couturier M, Van Melderen L (2001) The ratio between CcdA and CcdB modulates the transcriptional repression of the *ccd* poison-antidote system. *Mol Microbiol* 41(1):73–82.
22. Zhang J, Zhang Y, Inouye M (2003) Characterization of the interactions within the *mazEF* addiction module of *Escherichia coli*. *J Biol Chem* 278(34):32300–32306.
23. Lah J, et al. (2003) Recognition of the intrinsically flexible addition antidote MazE by a dromedary single domain antibody fragment: Structure, thermodynamics of binding, stability, and influence on interactions with DNA. *J Biol Chem* 278(16):14101–14111.
24. Magnuson R, Yarmolinsky MB (1998) Corepression of the P1 addiction operon by Phd and Doc. *J Bacteriol* 180(23):6342–6351.
25. Gazit E, Sauer RT (1999) Stability and DNA binding of the phd protein of the phage P1 plasmid addiction system. *J Biol Chem* 274(5):2652–2657.
26. Li G-Y, Zhang Y, Inouye M, Ikura M (2008) Structural mechanism of transcriptional autorepression of the *Escherichia coli* RelB/RelE antitoxin/toxin module. *J Mol Biol* 380(1):107–119.
27. Bailey SES, Hayes F (2009) Influence of operator site geometry on transcriptional control by the YefM-YoeB toxin-antitoxin complex. *J Bacteriol* 191(3):762–772.
28. Zhang J, Zhang Y, Zhu L, Suzuki M, Inouye M (2004) Interference of mRNA function by sequence-specific endoribonuclease PemK. *J Biol Chem* 279(20):20678–20684.
29. Pedersen K, Christensen SK, Gerdes K (2002) Rapid induction and reversal of a bacteriostatic condition by controlled expression of toxins and antitoxins. *Mol Microbiol* 45(2):501–510.
